# Supplementary material for: Genome-wide functional analysis reveals key roles for kinesins in the mammalian and mosquito stages of the malaria parasite life cycle
Source: PLoS Biol. 2022 Jul 28;20(7):e3001704. doi: 10.1371/journal.pbio.3001704 (PMC9333250; doi:10.1371/journal.pbio.3001704)
Supplement: S2 Data — (XLSX) [file pbio.3001704.s017.xlsx]

## Sheet: Sheet1
Fig 6C	Normalised expression
WTGFP	kinesin-13PTD
1.12995	0.169214
1.34822	0.120325
1.4393	0.252981
Fig 6D	Exflagellation centres per field
WTGFP	2	2	3	1	2	3	4	4	2	3	2	1	2	1	2	3	2	3	1	2	3	2	1	1	3	2	3	2	1	3	3	4	2	4	2	1	2	3	2	4	3	5	3	2	3
kinesin-13PTD	0	0	0	0	0	0	0	0	0	0	0	0	0	0	0	0		0	0	0		0	0		0	0	0	0	0	0	0	0	1	0	1	0	0	0	1	0	0	0	0	1	0
Fig 6E	Ookinete conversion percentage
WTGFP	kinesin-13PTD
67.1	0
71.9	0
72.3	0
Fig 6F	Normalised expression
	WTGFP		kinesin-13PTD
kinesin-4	1.37372	0.270207	1.40486	0.401541
kinesin-5	1.32617	0.309163	1.05306	0.23108
kinesin-8B	2.32768	0.452113	1.36782	0.565715
kinesin-8X	2.49092	0.286146	1.62676	0.556097
kinesin-13	2.57773	0.11969	0.359869	0.056367
kinesin-15	2.3144	0.486089	1.16983	0.629218
kinesin-20	2.4032	0.284071	0.530598	0.351105
kinesin-X3	2.34677	0.771225	1.82459	0.420926
kinesin-X4	0.248754	0.112109	0.162374	0.003925
